# Supplementary material for: Farmer’s Perceptions of Agroforestry Practices, Contributions to Rural Household Farm Income, and Their Determinants in Sodo Zuria District, Southern Ethiopia
Source: Hindawi journal article supplement (doi:10.1155/2023/5439171), 2023-01-12
Supplement: f1 [file 5439171.f1.doc]

**Supplementary Data**

Annex 1: Market prices of vegetables and fruits in the study area

| **1.Vegetables** | **Unit** | **Av.market price(ETB)** | **Bossa kebele** | **Waja kebele** | **Dalbo kebele** |
| --- | --- | --- | --- | --- | --- |
| Beat root | Kg | 100kg=500 | 550 | - | 500 |
| Carrot | Kg | 100kg =400 | 420 | - | 400 |
| Cabbage | Kg | 100kg =300 | 350 | - | 300 |
| Potato | Kg | 100kg =1000 | 1200 | 980 | 1000 |
| **2.Fruits** |  |  |  |  |  |
| Mango | Kg | 1kg=10 | 12 | 8 | - |
| Avocado | Kg | 1kg=10 | 15 | 5 | 10 |
| Banana | Kg | 1kg=12 | 12 | 11 | 13 |
| Coffee | Kg | 1kg =30 | 35 | 25 | - |

Source: Analyzed from market price, 2021

Annex 2: Annual average vegetable and fruit production for adopters and non- adopters of agroforestry practices in study area

| **Types of vegetables and fruit** | **Adopter Category** | **Mean production in kg/yr** | **Mean annual income (birr)/yr** | **Std. Deviation** |
| --- | --- | --- | --- | --- |
| Beet root | Adopters | 436.4 | 2182.00 | 3400.522 |
| Non-adopters | 180 | 900.00 | 776.439 |
| Cabbage | Adopters | 269 | 806.5789 | 2247.26293 |
| Non-adopters | 99 | 297.5333 | 182.93202 |
| Potato | Adopters | 199.7 | 1997.4138 | 2532.46330 |
| Non-adopters | 122.2 | 1222.2222 | 440.95855 |
| Carrot | Adopters | 425 | 1702.000 | 2464.2169 |
| Non-adopters | 128.25 | 513.750 | 279.4350 |
| Banana | Adopters | 42 | 506.6579 | 220.98946 |
| Non-adopters | 30 | 366.6667 | 235.80937 |
| Coffee | Adopters | 52 | 1580.000011 | 407.91011 |
| Non-adopters | 42 | 1174.6809 | 2065.77554 |

Annex 3: Adoption status and types of agroforestry practices in three Kebeles

| **Types of agroforestry practices** | **Name of sampled kebeles** | | | | | | **Over all n=173** | |
| --- | --- | --- | --- | --- | --- | --- | --- | --- |
| Dalbo n=64 | | Waja n=56 | | Bossa n=53 | | Total | |
| Frequency | % | Frequency | % | Frequency | % | Frequency | % |
| Home garden | 16 | 11.8 | 12 | 8.8 | 12 | 8.8 | 40 | 23.12 |
| Scattered trees | 11 | 8.1 | 8 | 5.9 | 9 | 6.6 | 28 | 16.18 |
| Woodlot | 10 | 7.4 | 8 | 5.9 | 8 | 5.9 | 26 | 15.02 |
| Boundary planting | 10 | 7.4 | 7 | 5.1 | 6 | 4.4 | 23 | 13.29 |
| Trees on range land | 7 | 5.1 | 5 | 3.7 | 6 | 4.4 | 18 | 10.4 |
| Adopters | 54 | 31.2 | 40 | 23 | 41 | 24 | 135 | 78.2 |
| Non adopters | 10 | 5.7 | 16 | 9.2 | 12 | 6.9 | 38 | 21.8 |
| Total | 64 | 37 | 56 | 33 | 53 | 31 | 173 | 100 |

Source: Analyzed from own household survey data, 2021

Annex 4: Distribution of the household’s annual mean income for adopters and non-adopters of agroforestry practices.

| **Agroforestry practices** | **Dalbo kebele** | | **Statistical Value** | |
| --- | --- | --- | --- | --- |
| Types agroforestry practices | adopters | non adopters | t-value | p-value |
| trees on range land | 15049.07 | 12920.00 | 0.96 | 0.34 |
| scattered trees | 3433.02 | 2300.00 | 1.88 | 0.07* |
| woo lot | 4521.76 | 3878.57 | 0.51 | 0.65 |
| home garden | 6666.98 | 4492.56 | 0.33 | 0.74 |
| **Agroforestry practices** | **Bossa kebeele** | | **Statistical Value** | |
| Types agroforestry practices | adopters | non adopters | t-value | p-value |
| trees on range land | 27578.54 | 9441.67 | 1.35 | 0.18 |
| scattered trees | 2465.00 | 1827.50 | 1.13 | 0.27 |
| wood lot | 6448.28 | 4000.00 | 1.28 | 0.21 |
| home garden | 825.68 | 722.22 | 0.66 | 0.51 |
| **Agroforestry practices** | **Waja kebele** | | **Statistical Value** | |
| Types agroforestry practices | adopters | non adopters | t-value | p-value |
| trees on range land | 16797.50 | 11212.50 | 1.93 | 0.06* |
| scattered trees | 2899.50 | 1959.38 | 2.52 | 0.01** |
| wood lot | 5175.86 | 3313.33 | 2.52 | 0.02** |
| home garden | 1160.00 | 225.00 | 1.17 | 0.26 |
